# Supplementary material for: Localized molecular chaperone synthesis maintains neuronal dendrite proteostasis
Source: PubMed Central journal article supplement — Nat Commun. 2024 Dec 30;15:10796. doi: 10.1038/s41467-024-55055-7 (PMC11685665; doi:10.1038/s41467-024-55055-7), 2024-12-30
Supplement: 41467_2024_55055_MOESM5_ESM.pdf [file 41467_2024_55055_MOESM5_ESM.pdf]

## Reporting Summary

Nature Portfolio wishes to improve the reproducibility of the work that we publish. This form provides structure for consistency and transparency in reporting. For further information on Nature Portfolio policies, see our [Editorial Policies](#) and the [Editorial Policy Checklist](#).

### Statistics

For all statistical analyses, confirm that the following items are present in the figure legend, table legend, main text, or Methods section.

- | n/a                                 | Confirmed                                                                                                                                                                                                                                                                                      |
|-------------------------------------|------------------------------------------------------------------------------------------------------------------------------------------------------------------------------------------------------------------------------------------------------------------------------------------------|
| <input type="checkbox"/>            | <input checked="" type="checkbox"/> The exact sample size ( $n$ ) for each experimental group/condition, given as a discrete number and unit of measurement                                                                                                                                    |
| <input type="checkbox"/>            | <input checked="" type="checkbox"/> A statement on whether measurements were taken from distinct samples or whether the same sample was measured repeatedly                                                                                                                                    |
| <input type="checkbox"/>            | <input checked="" type="checkbox"/> The statistical test(s) used AND whether they are one- or two-sided<br><i>Only common tests should be described solely by name; describe more complex techniques in the Methods section.</i>                                                               |
| <input checked="" type="checkbox"/> | <input type="checkbox"/> A description of all covariates tested                                                                                                                                                                                                                                |
| <input type="checkbox"/>            | <input checked="" type="checkbox"/> A description of any assumptions or corrections, such as tests of normality and adjustment for multiple comparisons                                                                                                                                        |
| <input type="checkbox"/>            | <input checked="" type="checkbox"/> A full description of the statistical parameters including central tendency (e.g. means) or other basic estimates (e.g. regression coefficient) AND variation (e.g. standard deviation) or associated estimates of uncertainty (e.g. confidence intervals) |
| <input type="checkbox"/>            | <input checked="" type="checkbox"/> For null hypothesis testing, the test statistic (e.g. $F$ , $t$ , $r$ ) with confidence intervals, effect sizes, degrees of freedom and $P$ value noted<br><i>Give <math>P</math> values as exact values whenever suitable.</i>                            |
| <input checked="" type="checkbox"/> | <input type="checkbox"/> For Bayesian analysis, information on the choice of priors and Markov chain Monte Carlo settings                                                                                                                                                                      |
| <input checked="" type="checkbox"/> | <input type="checkbox"/> For hierarchical and complex designs, identification of the appropriate level for tests and full reporting of outcomes                                                                                                                                                |
| <input checked="" type="checkbox"/> | <input type="checkbox"/> Estimates of effect sizes (e.g. Cohen's $d$ , Pearson's $r$ ), indicating how they were calculated                                                                                                                                                                    |

*Our web collection on [statistics for biologists](#) contains articles on many of the points above.*

### Software and code

Policy information about [availability of computer code](#)

|                 |                                                                                                                                                                                                                                                                                                                                                                                                                                                                                                                                                                                                                                                                                                                                                                                                                                                                                                                                                                                                                                                                                                                                                                                                                                                                                                                                   |
|-----------------|-----------------------------------------------------------------------------------------------------------------------------------------------------------------------------------------------------------------------------------------------------------------------------------------------------------------------------------------------------------------------------------------------------------------------------------------------------------------------------------------------------------------------------------------------------------------------------------------------------------------------------------------------------------------------------------------------------------------------------------------------------------------------------------------------------------------------------------------------------------------------------------------------------------------------------------------------------------------------------------------------------------------------------------------------------------------------------------------------------------------------------------------------------------------------------------------------------------------------------------------------------------------------------------------------------------------------------------|
| Data collection | Detection of smFISH signals and accompanied immunofluorescence spot was done using FISHquant (PMID: 23538861)                                                                                                                                                                                                                                                                                                                                                                                                                                                                                                                                                                                                                                                                                                                                                                                                                                                                                                                                                                                                                                                                                                                                                                                                                     |
| Data analysis   | <p><a href="https://github.com/LR-MVU/neuron">https://github.com/LR-MVU/neuron</a></p> <p>RNA-seq analysis was performed on <a href="http://usegalaxy.org">usegalaxy.org</a>. Adaptors and reads with a quality below 20 within 4-base sliding windows were removed using Trimmomatic (galaxy version 0.38.0; <a href="https://doi.org/10.1093/bioinformatics/btu170">https://doi.org/10.1093/bioinformatics/btu170</a>). Trimmed single-end reads were aligned to the mouse mm10 genome using STAR (galaxy version 2.7.8a+galaxy0; <a href="https://doi.org/10.1093/bioinformatics/bts635">https://doi.org/10.1093/bioinformatics/bts635</a>) with default parameters, and the number of reads per transcript was determined using featureCounts (galaxy version 2.0.1+galaxy2; <a href="https://doi.org/10.1093/bioinformatics/btt656">https://doi.org/10.1093/bioinformatics/btt656</a>) using default parameters. Differential gene expression was determined using DESeq2 (galaxy version 2.11.40.7+galaxy1; <a href="https://doi.org/10.1186/s13059-014-0550-8">https://doi.org/10.1186/s13059-014-0550-8</a>) using default parameters. Gene ontology analysis to identify biological processes enriched in differentially expressed genes was performed using <a href="http://geneontology.org">geneontology.org</a>.</p> |

For manuscripts utilizing custom algorithms or software that are central to the research but not yet described in published literature, software must be made available to editors and reviewers. We strongly encourage code deposition in a community repository (e.g. GitHub). See the Nature Portfolio [guidelines for submitting code & software](#) for further information.

## Data

Policy information about [availability of data](#)

All manuscripts must include a [data availability statement](#). This statement should provide the following information, where applicable:

- Accession codes, unique identifiers, or web links for publicly available datasets
- A description of any restrictions on data availability
- For clinical datasets or third party data, please ensure that the statement adheres to our [policy](#)

RNA-seq data: GEO accession number: GSE202202, Reviewer token: uvilyucclvsbpuz

Proteomics data: ProteomeXchange Project accession: PXD046036. Username: reviewer\_pxd046036@ebi.ac.uk Password: icaFMkF9

## Research involving human participants, their data, or biological material

Policy information about studies with [human participants or human data](#). See also policy information about [sex, gender \(identity/presentation\), and sexual orientation](#) and [race, ethnicity and racism](#).

Reporting on sex and gender

Primary neurons were a mix of male and female pups because the time for genotype postnatal day 0 and embryonic E13.5 pups before preparing viable cultures decreased the viability of the cultures.  
The human iPSC derived into motor neurons were previously established and published as state in references 126 and 128

Reporting on race, ethnicity, or other socially relevant groupings

not applicable

Population characteristics

not applicable

Recruitment

not applicable

Ethics oversight

not applicable

Note that full information on the approval of the study protocol must also be provided in the manuscript.

## Field-specific reporting

Please select the one below that is the best fit for your research. If you are not sure, read the appropriate sections before making your selection.

Life sciences  Behavioural & social sciences  Ecological, evolutionary & environmental sciences

For a reference copy of the document with all sections, see [nature.com/documents/nr-reporting-summary-flat.pdf](https://www.nature.com/documents/nr-reporting-summary-flat.pdf)

## Life sciences study design

All studies must disclose on these points even when the disclosure is negative.

Sample size

We did not predetermined the sample size but we count a higher number of neurons and dendrites than in previous reports using the similar single-neuron and single-molecule systems (Das et al., PMID: 37100055, Das et al PMID: 29938222, and Eliscovich et al PMID: 28223507 )

Data exclusions

No data were excluded

Replication

Data were obtained from 2 (iPSC derived to motor neurons in total 6 cultures) to 5 (murine primary neurons) biological replicates.

Randomization

not applicable

Blinding

not applicable

## Reporting for specific materials, systems and methods

We require information from authors about some types of materials, experimental systems and methods used in many studies. Here, indicate whether each material, system or method listed is relevant to your study. If you are not sure if a list item applies to your research, read the appropriate section before selecting a response.

## Materials &amp; experimental systems

| n/a                                 | Involvement                                                     |
|-------------------------------------|-----------------------------------------------------------------|
| <input type="checkbox"/>            | <input checked="" type="checkbox"/> Antibodies                  |
| <input type="checkbox"/>            | <input checked="" type="checkbox"/> Eukaryotic cell lines       |
| <input checked="" type="checkbox"/> | <input type="checkbox"/> Palaeontology and archaeology          |
| <input type="checkbox"/>            | <input checked="" type="checkbox"/> Animals and other organisms |
| <input checked="" type="checkbox"/> | <input type="checkbox"/> Clinical data                          |
| <input checked="" type="checkbox"/> | <input type="checkbox"/> Dual use research of concern           |
| <input checked="" type="checkbox"/> | <input type="checkbox"/> Plants                                 |

## Methods

| n/a                                 | Involvement                                     |
|-------------------------------------|-------------------------------------------------|
| <input checked="" type="checkbox"/> | <input type="checkbox"/> ChIP-seq               |
| <input checked="" type="checkbox"/> | <input type="checkbox"/> Flow cytometry         |
| <input checked="" type="checkbox"/> | <input type="checkbox"/> MRI-based neuroimaging |

## Antibodies

|                 |                                                                                                                                                                                                                                                                                                                                                                                                                                                                                                                                                                                                                                                                                                                                                                                                                                                                                                                                                                                                                                                                                                                                                                                          |
|-----------------|------------------------------------------------------------------------------------------------------------------------------------------------------------------------------------------------------------------------------------------------------------------------------------------------------------------------------------------------------------------------------------------------------------------------------------------------------------------------------------------------------------------------------------------------------------------------------------------------------------------------------------------------------------------------------------------------------------------------------------------------------------------------------------------------------------------------------------------------------------------------------------------------------------------------------------------------------------------------------------------------------------------------------------------------------------------------------------------------------------------------------------------------------------------------------------------|
| Antibodies used | <p>GFP AVES GFP1010<br/>           FUS Proteintech 11570-I-AP<br/>           MAP2 EMD Millipore AB5622<br/>           PSD95 Antibodies Incorporated 75-028<br/>           TAU R&amp;D Systems/Bio-Techne AF3494<br/>           GCN4 NOVUS NBP2-81273S<br/> <math>\beta</math>-Actin Sigma A2228<br/>           Goat Anti- chicken Alexa Fluor 488 Invitrogen A32931<br/>           Goat Anti-mouse Alexa Fluor 488 Invitrogen A32723<br/>           Goat Anti-rabbit Alexa Fluor 488 Invitrogen A32731<br/>           Goat Anti-rabbit Alexa Fluor 750 Invitrogen A-21039<br/>           Goat Anti-mouse Alexa Fluor 750 Invitrogen A-21037<br/>           Goat Anti-mouse Alexa Fluor 647 Invitrogen A-21236<br/>           HSP70 R&amp;D Systems/Bio-Techne AF1663<br/>           B-Actin R&amp;D Systems/Bio-Techne MAB8929<br/>           STAU2 Generated in Michael Kiebler's lab<br/>           GFP R&amp;D Systems MAB42401<br/>           HSP70 (Rb)R&amp;D Systems/Bio-Techne AF1663<br/>           Hsc70 Proteintech 10654-1-AP<br/>           Puromycin Sigma MABE343<br/>           STAU2 generated in Michael Kiebler's lab<br/>           HNRNP Proteintech 67445-1-Ig</p> |
| Validation      | <p>GCN4 and GFP antibodies validated by stained non-injected neurons. Specific signal belong to injected cells<br/>           FUS antibody validated by KD/KO<br/>           MAP2 control in human brain tissue or human glioblastoma T98G cells<br/>           PSD95 Produced by in vitro bioreactor culture of hybridoma line followed by Protein A affinity chromatography. Purified mAbs are &gt;90% specific antibody<br/>           TAU . Tau was detected in immersion fixed paraffinembedded sections of human Alzheimer's disease brain (cortex)<br/>           STAU2 Generated and validated as indicated in <a href="https://doi.org/10.1016/j.celrep.2013.11.039">https://doi.org/10.1016/j.celrep.2013.11.039</a><br/>           B-actin Peptide containing a sequence at the N-terminus of human beta Actin Accession # P60709<br/>           HSP70 (Rb) Only detectable upon stress. Detects the induced form of recombinant endogenous human, mouse and rat HSP70/ HSPA1A (HSP72) in Western blots. In Western blots, no cross-reactivity with the constitutively expressed HSC70 (HSP73) is detected</p>                                                                |

## Eukaryotic cell lines

Policy information about [cell lines and Sex and Gender in Research](#)

|                                                                   |                                                                                                                                                                                                                                                                                                                             |
|-------------------------------------------------------------------|-----------------------------------------------------------------------------------------------------------------------------------------------------------------------------------------------------------------------------------------------------------------------------------------------------------------------------|
| Cell line source(s)                                               | <p>primary hippocampal neurons - both sexes<br/>           primary motor neurons - both sexes<br/>           human motor neurons differentiated from iPSC - (reported in references 126 and 128 where they were generated)<br/>           Neuro-2a - Male<br/>           293T - Female<br/>           MEFs - both sexes</p> |
| Authentication                                                    | None of the cell lines used were authenticated                                                                                                                                                                                                                                                                              |
| Mycoplasma contamination                                          | Neuro-2a, MEF and 293T are stained with DAPI and observed under the microscope. No DAPI signal is observed in the cytoplasm over time.                                                                                                                                                                                      |
| Commonly misidentified lines (See <a href="#">ICLAC</a> register) | No commonly misidentified cell lines per ICLAC register were used                                                                                                                                                                                                                                                           |

## Animals and other research organisms

Policy information about [studies involving animals](#); [ARRIVE guidelines](#) recommended for reporting animal research, and [Sex and Gender in Research](#)

|                         |                                                                                                                                                                                                                  |
|-------------------------|------------------------------------------------------------------------------------------------------------------------------------------------------------------------------------------------------------------|
| Laboratory animals      | CD1, C57BL/6, and FVB mice purchased from Charles River and kept at McGill Animal Facility following Canadian Council of Animal Health. Neurons were obtained from P0 pups from females aged between 8-36 weeks. |
| Wild animals            | not applicable                                                                                                                                                                                                   |
| Reporting on sex        | Findings apply to male and females. Primary neuronal cultures were obtained from female and male pups and mixed in the culture.                                                                                  |
| Field-collected samples | not applicable                                                                                                                                                                                                   |
| Ethics oversight        | Housing and euthanasia were performed in compliance with the Canadian Council on Animal Care. Ethical approval was provided by McGill University                                                                 |

Note that full information on the approval of the study protocol must also be provided in the manuscript.

## Plants

|                       |                |
|-----------------------|----------------|
| Seed stocks           | not applicable |
| Novel plant genotypes | not applicable |
| Authentication        | not applicable |
