# Supplementary material for: Localized molecular chaperone synthesis maintains neuronal dendrite proteostasis
Source: PubMed Central journal article supplement — Nat Commun. 2024 Dec 30;15:10796. doi: 10.1038/s41467-024-55055-7 (PMC11685665; doi:10.1038/s41467-024-55055-7), 2024-12-30
Supplement: 41467_2024_55055_MOESM6_ESM.pdf [file 41467_2024_55055_MOESM6_ESM.pdf]

## Localized molecular chaperone synthesis maintains neuronal dendrite proteostasis

Corresponding Author: Dr Maria Vera

This manuscript has been previously reviewed at another journal. This document only contains information relating to versions considered at Nature Communications.

**This file contains all reviewer reports in order by version, followed by all author rebuttals in order by version.**

Version 0:

Reviewer comments:

Reviewer #2

(Remarks to the Author)

The authors have addressed my concerns.

Two minor points - it is still unclear what the grey vs red text means in figure 1e. I consider this important because others working on these genes may be interested to determine if that transcript acts the same or different from Hspa8.

The first sentence of the discussion - the semi-colon should be a colon.

(Remarks on code availability)

Reviewer #3

(Remarks to the Author)

The authors adequately addressed all the remaining issues.

(Remarks on code availability)

**Open Access** This Peer Review File is licensed under a Creative Commons Attribution 4.0 International License, which permits use, sharing, adaptation, distribution and reproduction in any medium or format, as long as you give appropriate credit to the original author(s) and the source, provide a link to the Creative Commons license, and indicate if changes were made.

In cases where reviewers are anonymous, credit should be given to 'Anonymous Referee' and the source.

The images or other third party material in this Peer Review File are included in the article's Creative Commons license, unless indicated otherwise in a credit line to the material. If material is not included in the article's Creative Commons license and your intended use is not permitted by statutory regulation or exceeds the permitted use, you will need to obtain permission directly from the copyright holder.

To view a copy of this license, visit <https://creativecommons.org/licenses/by/4.0/>
